# Supplementary material
Source: HighWire-hosted journal article supplement (https://bmjopen.bmj.com/content/13/9/e062928)
Supplement: inline-supplementary-material-1 [file inline-supplementary-material-1.pdf]

## Focus Group Discussion Guide for HIVST\_VM

**Welcome Remarks:**

- Thank you for agreeing to be part of the interview
- We will be asking you questions around your:
- Experiences engaging in HIV testing, Perceptions and acceptability of using HIVST and linkage to care
- Feasibility of using HIVST via digital vending machine technology to improve testing for HIV and linkage to care
- What we will discuss today will be kept confidential. That means that we will not disclose your name or personal details as we use this information
- We will be recording this interview using this voice recorder. This is because it is difficult to remember everything that we will discuss in this interview. Please let us know if this is ok with you.

Again my name is .....

Please feel free and be open to share your thought around what will be discussed in whatever language you are comfortable with. Remember there is no right or wrong answer, what we are interested in are your opinions

**Topic Guide - Focus Group Discussion****FGD Topic 1: HIV care and testing Version 1.0, 25 October 2018 2018**

**Objective(s):** Explore experiences of young people currently engaging in HIV testing, Determine HIV risk perception among adolescent males

**1. HIV testing and care**

- a. Is it important for guys your age to get tested regularly for HIV?
- b. What would motivate guys like you to get tested for HIV?
- c. What would stop guys like you to get tested for HIV?
- d. Who would or wouldn't need to know about you testing for HIV? Why?
- e. Can someone talk about an experience when they went for a HIV test that went really well?
- f. can anyone share an HIV test experience when someone went for an Hiv test that went really well(it could be your experience or someone else of your age)
- g. what about an experience when someone of your age went for an Hiv test that did not go well(it could be your experience or someone else of your age)
- h. what would you do after testing if your result was
  - (i) negative
  - (ii) positive

**2. Health Care Providers (HCPs) - what about a health care provider would make you most open to:**

- a. honestly answer questions about your health behavior relating to HIV?
- b. discuss possible changes to your health behavior relating to HIV?
- c. act on suggested actions?
- d. have them perform a physical exam?
- e. come back to see them again?

**FGD Topic 2: HIV Self-testing Version 1.0, 25 October 2018 2018**

**Objective:** Explore the perceptions, experiences, and acceptability of using HIVST and linkage to care (going to the clinic for confirmatory test and if positive initiate),

**1. what did you know about HIV self testing before today**

- If any have heard of the method, ask the following: What have you learned about this subject? Who told you about it?

- o What are some of the good things you have heard about it?

- o What are some of the bad things you have heard about it?

*Facilitator instruction: show the video of the HIV self testing*

- Do you think it is something that people might be interested in?

- o Do you know anyone who has used this method? What was his/her experience?

- o Have you considered using it? Please explain.

**2. (i) What kind of things would encourage you or other young men to use a HIVST?** (you *Might need to probe depending on how they answer, especially the broader answers i.e. easy access, what else etc.*)

**2. (ii) What kinds of things would discourage you or other young men from using a HIVST?** (*Might need to probe depending on how they answer, especially the broader answers i.e. poverty, stigma, etc.*)

3. Based on your answers from the previous topic about Health care providers (HCPs) what would:

- (i) Influence you to link to care after receiving a positive HIVST?

- (ii) Deter you to link to care after receiving a positive HIVST?

- (iii) Would you see it as important to be linked to care after receiving a positive HIVST results?

Probe: why do you say so?

**FGD Topic 3: HIV Self-testing via vending machine – acceptability and feasibility Version 1.0, 25 October 2018 2018**

**Objectives:** Determine the acceptability and feasibility of using HIVST via digital vending machine technology to improve testing for HIV, Identify barriers and facilitators among clients for the implementation of HIVST via digital vending machine technology

**1.** How do you think a HIVST vending machine would be received in your community?

Would young men use it? Why or why not?

**2.** Where do you think would be a good location for such a machine? Why?

**3.** What would your parents/guardians say if they knew you had used the machine? What about your friends?

**FGD Topic 4: HIV Self-testing via vending machine – Participatory Design Version 1.0, 25 October 2018 2018**

**Objectives:** Design a bespoke vending machine following participatory design workshops with potential clients, designers and health care professionals

**1.** If a young man used a HIVST and tested positive, what do you think he would want to do next?

**2.** If you could imagine this kind of machine, what would it look like? Be as descriptive as possible, even the color, shape, design, etc
