# Supplementary material
Source: HighWire-hosted journal article supplement (https://bmjopen.bmj.com/content/13/9/e062928)
Supplement: inline-supplementary-material-3 [file inline-supplementary-material-3.pdf]

## SRQR Checklist for Drivers of HIV Testing A Snapshot of Barriers and Facilitators among ABYM

|                                             |           | Reporting Item                                                                                                                                                                                                                                                                                                                                                                                                                                                                                                                                                                                                                       | Line number          |
|---------------------------------------------|-----------|--------------------------------------------------------------------------------------------------------------------------------------------------------------------------------------------------------------------------------------------------------------------------------------------------------------------------------------------------------------------------------------------------------------------------------------------------------------------------------------------------------------------------------------------------------------------------------------------------------------------------------------|----------------------|
| <b>Title</b>                                | <b>#1</b> | Concise description of the nature and topic of the study identifying the study as qualitative or indicating the approach (e.g. ethnography, grounded theory) or data collection methods (e.g. interview, focus group) is recommended                                                                                                                                                                                                                                                                                                                                                                                                 | Line 1 and line 2    |
| <b>Abstract</b>                             | <b>#2</b> | Summary of the key elements of the study using the abstract format of the intended publication; typically includes background, purpose, methods, results and conclusions                                                                                                                                                                                                                                                                                                                                                                                                                                                             | Line 21 to line 49   |
| <b>Introduction</b>                         |           |                                                                                                                                                                                                                                                                                                                                                                                                                                                                                                                                                                                                                                      |                      |
| Problem formulation                         | <b>#3</b> | Description and significance of the problem / phenomenon studied: review of relevant theory and empirical work; problem statement                                                                                                                                                                                                                                                                                                                                                                                                                                                                                                    | Line 22 to line 24   |
| Purpose or research question                | <b>#4</b> | Purpose of the study and specific objectives or questions                                                                                                                                                                                                                                                                                                                                                                                                                                                                                                                                                                            | Line 25 to line 27   |
| <b>Methods</b>                              |           |                                                                                                                                                                                                                                                                                                                                                                                                                                                                                                                                                                                                                                      |                      |
| Qualitative approach and research paradigm  | <b>#5</b> | Qualitative approach (e.g. ethnography, grounded theory, case study, phenomenology, narrative research) and guiding theory if appropriate; identifying the research paradigm (e.g. postpositivist, constructivist / interpretivist) is also recommended; rationale. The rationale should briefly discuss the justification for choosing that theory, approach, method or technique rather than other options available; the assumptions and limitations implicit in those choices and how those choices influence study conclusions and transferability. As appropriate the rationale for several items might be discussed together. | Line 28 to line 33   |
| Researcher characteristics and reflexivity  | <b>#6</b> | Researchers' characteristics that may influence the research, including personal attributes, qualifications / experience, relationship with participants, assumptions and / or presuppositions; potential or actual interaction between researchers' characteristics and the research questions, approach, methods, results and / or transferability                                                                                                                                                                                                                                                                                 | Line 102 to line 113 |
| Context                                     | <b>#7</b> | Setting / site and salient contextual factors; rationale                                                                                                                                                                                                                                                                                                                                                                                                                                                                                                                                                                             | Line 124 to line 136 |
| Sampling strategy                           | <b>#8</b> | How and why research participants, documents, or events were selected; criteria for deciding when no further sampling was necessary (e.g. sampling saturation); rationale                                                                                                                                                                                                                                                                                                                                                                                                                                                            | Line 138 to line 152 |
| Ethical issues pertaining to human subjects | <b>#9</b> | Documentation of approval by an appropriate ethics review board and participant consent, or explanation for                                                                                                                                                                                                                                                                                                                                                                                                                                                                                                                          | Line 181 to line 195 |

## SRQR Checklist for Drivers of HIV Testing A Snapshot of Barriers and Facilitators among ABYM

|                                                                                             |     |                                                                                                                                                                                                                                                                                                          |                      |
|---------------------------------------------------------------------------------------------|-----|----------------------------------------------------------------------------------------------------------------------------------------------------------------------------------------------------------------------------------------------------------------------------------------------------------|----------------------|
|                                                                                             |     | lack thereof;<br>other confidentiality and data security issues                                                                                                                                                                                                                                          |                      |
| Data collection methods                                                                     | #10 | Types of data collected; details of data collection procedures including (as appropriate) start and stop dates of data collection and analysis, iterative process, triangulation of sources / methods, and modification of procedures in response to evolving study findings; rationale                  | Line 154 to line 163 |
| Data collection instruments and technologies                                                | #11 | Description of instruments (e.g. interview guides, questionnaires) and devices (e.g. audio recorders) used for data collection; if / how the instruments(s) changed over the course of the study                                                                                                         | Line 156 to line 160 |
| Units of study                                                                              | #12 | Number and relevant characteristics of participants, documents, or events included in the study; level of participation (could be reported in results)                                                                                                                                                   | Line 198 to line 208 |
| Data processing                                                                             | #13 | Methods for processing data prior to and during analysis, including transcription, data entry, data management and security, verification of data integrity, data coding, and anonymisation / deidentification of excerpts                                                                               | Line 165 to line 179 |
| Data analysis                                                                               | #14 | Process by which inferences, themes, etc. were identified and developed, including the researchers involved in data analysis; usually references a specific paradigm or approach; rationale                                                                                                              | Line 165 to line 179 |
| Techniques to enhance trustworthiness                                                       | #15 | Techniques to enhance trustworthiness and credibility of data analysis (e.g. member checking, audit trail, triangulation); rationale                                                                                                                                                                     | Line 171 to line 179 |
| <b>Results/findings</b>                                                                     |     |                                                                                                                                                                                                                                                                                                          |                      |
| Syntheses and interpretation                                                                | #16 | Main findings (e.g. interpretations, inferences, and themes); might include development of a theory or model, or integration with prior research or theory                                                                                                                                               | Line 209 to line 328 |
| Links to empirical data                                                                     | #17 | Evidence (e.g. quotes, field notes, text excerpts, photographs) to substantiate analytic findings                                                                                                                                                                                                        | Line 215 to line 328 |
| <b>Discussion</b>                                                                           |     |                                                                                                                                                                                                                                                                                                          |                      |
| Integration with prior work, implications, transferability and contribution(s) to the field | #18 | Short summary of main findings; explanation of how findings and conclusions connect to, support, elaborate on, or challenge conclusions of earlier scholarship; discussion of scope of application / generalizability; identification of unique contributions(s) to scholarship in a discipline or field | Line 331 to line 394 |
| Limitations                                                                                 | #19 | Trustworthiness and limitations of findings                                                                                                                                                                                                                                                              | Line 51 to line 60   |
| <b>Other</b>                                                                                |     |                                                                                                                                                                                                                                                                                                          |                      |

## SRQR Checklist for Drivers of HIV Testing A Snapshot of Barriers and Facilitators among ABYM

|                       |            |                                                                                                                |                      |
|-----------------------|------------|----------------------------------------------------------------------------------------------------------------|----------------------|
| Conflicts of interest | <b>#20</b> | Potential sources of influence of perceived influence on study conduct and conclusions; how these were managed | Line 446 to line 447 |
| Funding               | <b>#21</b> | Sources of funding and other support; role of funders in data collection, interpretation and reporting         | Line 449 to line 450 |
|                       |            |                                                                                                                |                      |
